# Supplementary material for: Synthesis, structure, photoluminescence and magnetic properties of new 3-D lanthanide-pyridine-2,4,6-tricarboxylate frameworks
Source: Royal Society of Chemistry journal article supplement (doi:10.1039/b811883n), 2008-01-01
Supplement: b811883n.pdf [file b811883n.pdf]

## Electronic Supplementary Information

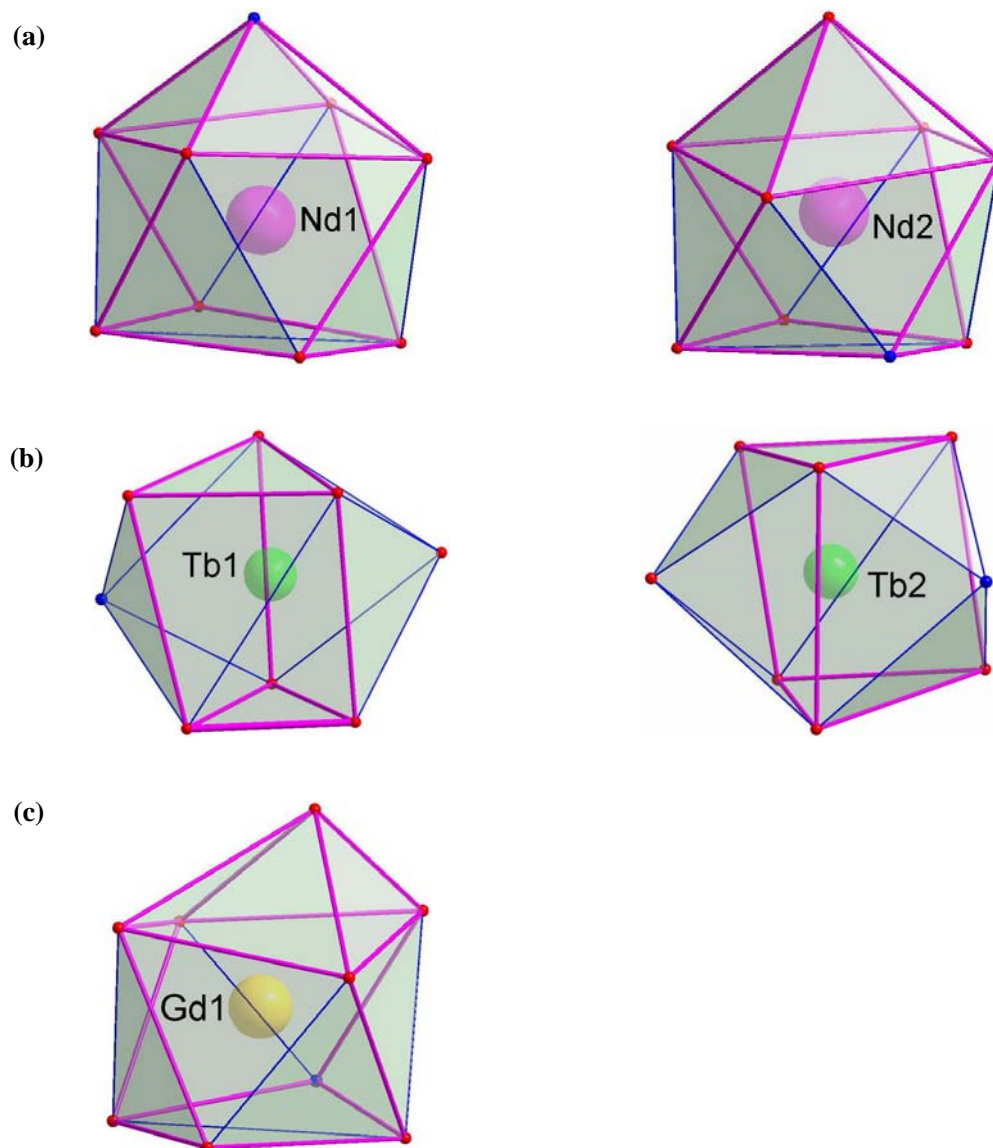

**Figure S1** Coordination polyhedra of (a) Nd1 and Nd2 atoms in **1**, (b) Tb1 and Tb2 atoms in **5** and (c) Gd1 in **4**.

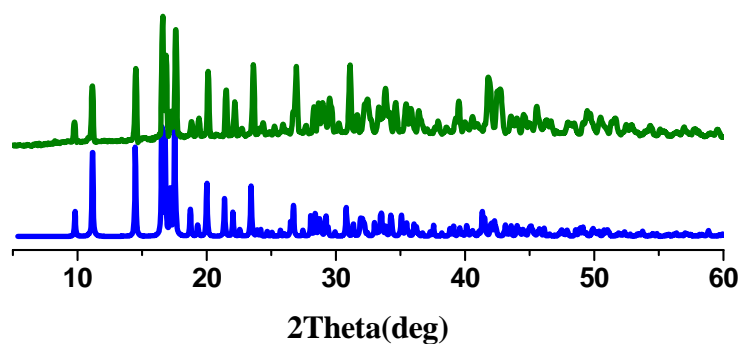

**Figure S2** Observed (blue) and calculated (green) X-ray powder diffraction patterns for **1**.

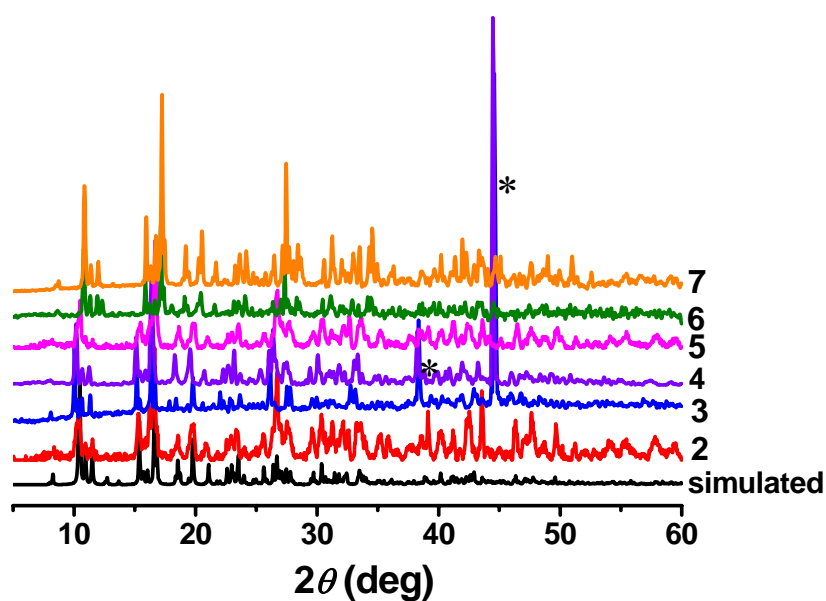

**Figure S3** Observed (blue) and calculated (green) X-ray powder diffraction patterns for **2-7** (\* indicates the pattern of background due to litter sample).

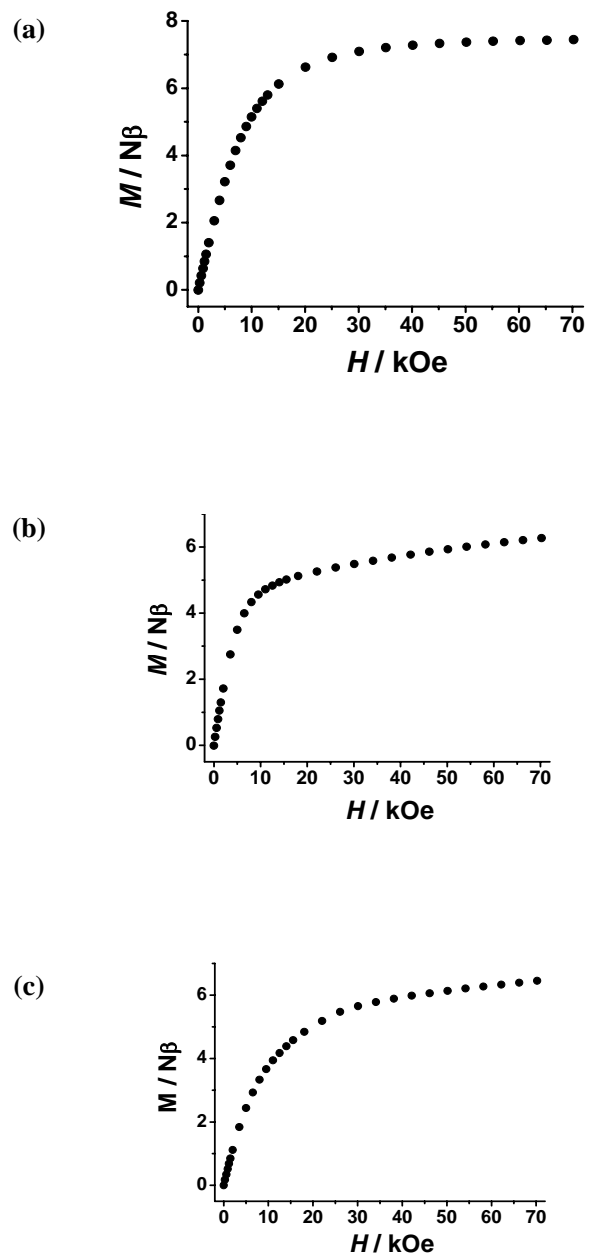

**Figure S4** Plots of  $M$  versus  $H$  for **4** (a), **6** (b) and **7** (c) at 2 K.

**Table S1.** Selected Bond lengths (Å) and angles (°) for **1-7**.

| Compound <b>1</b>  |            |                    |            |
|--------------------|------------|--------------------|------------|
| Nd(1)-O(3a)        | 2.429(4)   | Nd(2)-O(10d)       | 2.424(4)   |
| Nd(1)-O(3W)        | 2.447(5)   | Nd(2)-O(7)         | 2.442(4)   |
| Nd(1)-O(6)         | 2.468(4)   | Nd(2)-O(6W)        | 2.453(5)   |
| Nd(1)-O(1W)        | 2.505(5)   | Nd(2)-O(4e)        | 2.467(4)   |
| Nd(1)-O(11b)       | 2.506(4)   | Nd(2)-O(5W)        | 2.468(5)   |
| Nd(1)-O(9c)        | 2.514(4)   | Nd(2)-O(12)        | 2.481(4)   |
| Nd(1)-O(1)         | 2.533(4)   | Nd(2)-O(2)         | 2.514(4)   |
| Nd(1)-O(2W)        | 2.590(5)   | Nd(2)-N(2)         | 2.583(5)   |
| Nd(1)-N(1)         | 2.625(5)   | Nd(2)-O(4W)        | 2.694(6)   |
| O(3a)-Nd(1)-O(3W)  | 106.6(2)   | O(11b)-Nd(1)-O(2W) | 107.3(2)   |
| O(3a)-Nd(1)-O(6)   | 78.81(16)  | O(9c)-Nd(1)-O(2W)  | 139.92(18) |
| O(3W)-Nd(1)-O(6)   | 146.97(18) | O(1)-Nd(1)-O(2W)   | 72.83(17)  |
| O(3a)-Nd(1)-O(1W)  | 68.92(17)  | O(3a)-Nd(1)-N(1)   | 125.18(15) |
| O(3W)-Nd(1)-O(1W)  | 135.5(2)   | O(3W)-Nd(1)-N(1)   | 127.3(2)   |
| O(6)-Nd(1)-O(1W)   | 77.29(17)  | O(6)-Nd(1)-N(1)    | 62.36(15)  |
| O(3a)-Nd(1)-O(11b) | 71.67(16)  | O(1W)-Nd(1)-N(1)   | 66.04(16)  |
| O(3W)-Nd(1)-O(11b) | 67.63(16)  | O(11b)-Nd(1)-N(1)  | 134.14(15) |
| O(6)-Nd(1)-O(11b)  | 84.17(14)  | O(9c)-Nd(1)-N(1)   | 69.41(14)  |
| O(1W)-Nd(1)-O(11b) | 138.89(17) | O(1)-Nd(1)-N(1)    | 60.74(14)  |
| O(3a)-Nd(1)-O(9c)  | 141.37(16) | O(2W)-Nd(1)-N(1)   | 118.5(2)   |
| O(3W)-Nd(1)-O(9c)  | 76.7(2)    | O(10d)-Nd(2)-O(7)  | 92.71(15)  |
| O(6)-Nd(1)-O(9c)   | 79.53(15)  | O(10d)-Nd(2)-O(6W) | 86.41(18)  |
| O(1W)-Nd(1)-O(9c)  | 135.31(17) | O(7)-Nd(2)-O(6W)   | 148.02(16) |
| O(11b)-Nd(1)-O(9c) | 74.64(16)  | O(10d)-Nd(2)-O(4e) | 143.87(15) |
| O(3a)-Nd(1)-O(1)   | 138.30(16) | O(7)-Nd(2)-O(4e)   | 82.42(15)  |
| O(3W)-Nd(1)-O(1)   | 74.88(17)  | O(6W)-Nd(2)-O(4e)  | 79.75(17)  |
| O(6)-Nd(1)-O(1)    | 123.09(15) | O(10d)-Nd(2)-O(5W) | 69.99(15)  |
| O(1W)-Nd(1)-O(1)   | 81.27(16)  | O(7)-Nd(2)-O(5W)   | 133.29(18) |
| O(11b)-Nd(1)-O(1)  | 138.54(15) | O(6W)-Nd(2)-O(5W)  | 76.10(18)  |
| O(9c)-Nd(1)-O(1)   | 80.23(14)  | O(4e)-Nd(2)-O(5W)  | 136.27(16) |
| O(3a)-Nd(1)-O(2W)  | 69.73(18)  | O(10d)-Nd(2)-O(12) | 133.60(15) |

|                    |            |                   |            |
|--------------------|------------|-------------------|------------|
| O(3W)-Nd(1)-O(2W)  | 68.0(2)    | O(7)-Nd(2)-O(12)  | 124.52(14) |
| O(6)-Nd(1)-O(2W)   | 140.3(2)   | O(6W)-Nd(2)-O(12) | 75.53(16)  |
| O(1W)-Nd(1)-O(2W)  | 69.3(2)    | O(4e)-Nd(2)-O(12) | 74.65(14)  |
| O(4e)-Nd(2)-N(2)   | 70.97(14)  | O(5W)-Nd(2)-O(12) | 64.34(14)  |
| O(5W)-Nd(2)-N(2)   | 100.57(16) | O(10d)-Nd(2)-O(2) | 72.77(15)  |
| O(12)-Nd(2)-N(2)   | 61.80(14)  | O(7)-Nd(2)-O(2)   | 76.39(13)  |
| O(2)-Nd(2)-N(2)    | 127.09(14) | O(6W)-Nd(2)-O(2)  | 72.83(14)  |
| O(10d)-Nd(2)-O(4W) | 70.77(17)  | O(4e)-Nd(2)-O(2)  | 71.29(14)  |
| O(7)-Nd(2)-O(4W)   | 66.14(16)  | O(5W)-Nd(2)-O(2)  | 132.30(15) |
| O(6W)-Nd(2)-O(4W)  | 141.50(17) | O(12)-Nd(2)-O(2)  | 136.70(15) |
| O(4e)-Nd(2)-O(4W)  | 135.94(16) | O(10d)-Nd(2)-N(2) | 137.51(16) |
| O(6W)-Nd(2)-N(2)   | 132.91(17) | O(7)-Nd(2)-N(2)   | 63.08(14)  |

**Compound 2**

|                    |            |                     |            |
|--------------------|------------|---------------------|------------|
| Sm(1)-O(10a)       | 2.400(3)   | Sm(2)-O(2)          | 2.354(3)   |
| Sm(1)-O(1)         | 2.425(3)   | Sm(2)-O(8c)         | 2.355(3)   |
| Sm(1)-O(6)         | 2.440(3)   | Sm(2)-O(3c)         | 2.376(4)   |
| Sm(1)-O(2w)        | 2.451(3)   | Sm(2)-O(9d)         | 2.410(3)   |
| Sm(1)-O(1w)        | 2.473(3)   | Sm(2)-O(12)         | 2.425(3)   |
| Sm(1)-O(3w)        | 2.495(3)   | Sm(2)-O(5e)         | 2.427(3)   |
| Sm(1)-N(1)         | 2.543(4)   | Sm(2)-O(7)          | 2.439(3)   |
| Sm(1)-O(12b)       | 2.571(3)   | Sm(2)-N(2)          | 2.539(4)   |
| Sm(1)-O(11b)       | 2.580(3)   |                     |            |
| O(10a)-Sm(1)-O(1)  | 86.96(12)  | O(3W)-Sm(1)-N(1)    | 113.74(12) |
| O(10a)-Sm(1)-O(6)  | 145.72(11) | O(10a)-Sm(1)-O(12b) | 75.72(10)  |
| O(1)-Sm(1)-O(6)    | 126.35(10) | O(1)-Sm(1)-O(12b)   | 75.03(11)  |
| O(10a)-Sm(1)-O(2W) | 81.97(13)  | O(6)-Sm(1)-O(12b)   | 117.01(10) |
| O(1)-Sm(1)-O(2W)   | 72.47(12)  | O(2W)-Sm(1)-O(12b)  | 141.23(11) |
| O(6)-Sm(1)-O(2W)   | 99.25(12)  | O(1W)-Sm(1)-O(12b)  | 71.22(11)  |
| O(10a)-Sm(1)-O(1W) | 77.79(12)  | O(3W)-Sm(1)-O(12b)  | 134.59(11) |
| O(1)-Sm(1)-O(1W)   | 145.43(11) | N(1)-Sm(1)-O(12b)   | 109.75(11) |
| O(6)-Sm(1)-O(1W)   | 77.16(10)  | O(10a)-Sm(1)-O(11b) | 126.22(10) |
| O(2W)-Sm(1)-O(1W)  | 134.05(12) | O(1)-Sm(1)-O(11b)   | 78.15(11)  |

|                    |            |                     |            |
|--------------------|------------|---------------------|------------|
| O(10a)-Sm(1)-O(3W) | 75.57(12)  | O(6)-Sm(1)-O(11b)   | 74.75(10)  |
| O(1)-Sm(1)-O(3W)   | 136.89(12) | O(2W)-Sm(1)-O(11b)  | 137.90(12) |
| O(6)-Sm(1)-O(3W)   | 73.77(12)  | O(1W)-Sm(1)-O(11b)  | 86.13(11)  |
| O(2W)-Sm(1)-O(3W)  | 66.32(12)  | O(3W)-Sm(1)-O(11b)  | 143.27(11) |
| O(1W)-Sm(1)-O(3W)  | 68.84(12)  | N(1)-Sm(1)-O(11b)   | 66.49(11)  |
| O(10a)-Sm(1)-N(1)  | 146.23(12) | O(12b)-Sm(1)-O(11b) | 50.55(9)   |
| O(1)-Sm(1)-N(1)    | 63.79(11)  | O(2)-Sm(2)-O(8c)    | 77.79(14)  |
| O(6)-Sm(1)-N(1)    | 63.09(10)  | O(2)-Sm(2)-O(3c)    | 143.15(13) |
| O(2W)-Sm(1)-N(1)   | 73.66(12)  | O(8c)-Sm(2)-O(3c)   | 78.80(14)  |
| O(1W)-Sm(1)-N(1)   | 135.95(11) | O(2)-Sm(2)-O(9d)    | 77.96(12)  |
| O(8c)-Sm(2)-O(5e)  | 119.68(13) | O(8c)-Sm(2)-O(9d)   | 85.45(12)  |
| O(3c)-Sm(2)-O(5e)  | 71.27(13)  | O(3c)-Sm(2)-O(9d)   | 72.15(13)  |
| O(9d)-Sm(2)-O(5e)  | 129.35(12) | O(2)-Sm(2)-O(12)    | 87.38(11)  |
| O(12)-Sm(2)-O(5e)  | 82.76(11)  | O(8c)-Sm(2)-O(12)   | 156.28(12) |
| O(2)-Sm(2)-O(7)    | 82.60(12)  | O(3c)-Sm(2)-O(12)   | 103.80(12) |
| O(8c)-Sm(2)-O(7)   | 69.98(11)  | O(9d)-Sm(2)-O(12)   | 73.31(11)  |
| O(3c)-Sm(2)-O(7)   | 115.12(13) | O(2)-Sm(2)-O(5e)    | 145.56(12) |
| O(9d)-Sm(2)-O(7)   | 151.40(11) | O(5e)-Sm(2)-O(7)    | 77.30(12)  |
| O(12)-Sm(2)-O(7)   | 126.76(10) | O(2)-Sm(2)-N(2)     | 75.42(12)  |
| O(9d)-Sm(2)-N(2)   | 129.36(12) | O(8c)-Sm(2)-N(2)    | 128.51(12) |
| O(12)-Sm(2)-N(2)   | 63.25(11)  | O(3c)-Sm(2)-N(2)    | 141.00(13) |
| O(5e)-Sm(2)-N(2)   | 70.65(11)  | O(7)-Sm(2)-N(2)     | 63.61(11)  |

**Compound 3**

|              |          |             |          |
|--------------|----------|-------------|----------|
| Eu(1)-O(10a) | 2.390(4) | Eu(2)-O(8c) | 2.337(5) |
| Eu(1)-O(1)   | 2.410(5) | Eu(2)-O(2)  | 2.344(5) |
| Eu(1)-O(6)   | 2.425(4) | Eu(2)-O(3c) | 2.351(5) |
| Eu(1)-O(2W)  | 2.432(5) | Eu(2)-O(9d) | 2.391(5) |
| Eu(1)-O(1W)  | 2.445(5) | Eu(2)-O(12) | 2.416(4) |
| Eu(1)-O(3W)  | 2.481(5) | Eu(2)-O(5e) | 2.422(4) |
| Eu(1)-N(1)   | 2.522(5) | Eu(2)-O(7)  | 2.422(4) |
| Eu(1)-O(11b) | 2.566(5) | Eu(2)-N(2)  | 2.526(5) |
| Eu(1)-O(12b) | 2.568(4) |             |          |

|                     |            |                     |            |
|---------------------|------------|---------------------|------------|
| O(10a)-Eu(1)-O(1)   | 86.49(17)  | O(1W)-Eu(1)-O(11b)  | 86.18(16)  |
| O(10a)-Eu(1)-O(6)   | 145.39(16) | O(3W)-Eu(1)-O(11b)  | 143.09(16) |
| O(1)-Eu(1)-O(6)     | 127.11(15) | N(1)-Eu(1)-O(11b)   | 66.47(15)  |
| O(10a)-Eu(1)-O(2W)  | 81.82(18)  | O(10a)-Eu(1)-O(12b) | 75.78(14)  |
| O(1)-Eu(1)-O(2W)    | 72.87(17)  | O(1)-Eu(1)-O(12b)   | 74.63(15)  |
| O(6)-Eu(1)-O(2W)    | 99.05(17)  | O(6)-Eu(1)-O(12b)   | 117.26(15) |
| O(10a)-Eu(1)-O(1W)  | 77.88(17)  | O(2W)-Eu(1)-O(12b)  | 141.31(16) |
| O(1)-Eu(1)-O(1W)    | 144.93(16) | O(1W)-Eu(1)-O(12b)  | 71.19(15)  |
| O(6)-Eu(1)-O(1W)    | 77.02(15)  | O(3W)-Eu(1)-O(12b)  | 134.52(16) |
| O(2W)-Eu(1)-O(1W)   | 133.94(17) | N(1)-Eu(1)-O(12b)   | 109.76(15) |
| O(10a)-Eu(1)-O(3W)  | 75.68(17)  | O(11b)-Eu(1)-O(12b) | 50.60(13)  |
| O(1)-Eu(1)-O(3W)    | 137.22(17) | O(8c)-Eu(2)-O(2)    | 77.6(2)    |
| O(6)-Eu(1)-O(3W)    | 73.21(17)  | O(8c)-Eu(2)-O(3c)   | 78.94(19)  |
| O(2W)-Eu(1)-O(3W)   | 66.37(17)  | O(2)-Eu(2)-O(3c)    | 143.20(18) |
| O(1W)-Eu(1)-O(3W)   | 68.71(17)  | O(8c)-Eu(2)-O(9d)   | 84.84(17)  |
| O(10a)-Eu(1)-N(1)   | 146.03(18) | O(2)-Eu(2)-O(9d)    | 77.79(17)  |
| O(1)-Eu(1)-N(1)     | 64.19(16)  | O(3c)-Eu(2)-O(9d)   | 72.24(19)  |
| O(6)-Eu(1)-N(1)     | 63.45(15)  | O(8c)-Eu(2)-O(12)   | 155.64(18) |
| O(2W)-Eu(1)-N(1)    | 73.68(18)  | O(2)-Eu(2)-O(12)    | 86.87(16)  |
| O(1W)-Eu(1)-N(1)    | 136.05(16) | O(3c)-Eu(2)-O(12)   | 104.21(17) |
| O(3W)-Eu(1)-N(1)    | 113.75(17) | O(9d)-Eu(2)-O(12)   | 73.53(15)  |
| O(10a)-Eu(1)-O(11b) | 126.32(14) | O(8c)-Eu(2)-O(5e)   | 120.18(19) |
| O(1)-Eu(1)-O(11b)   | 78.10(16)  | O(2)-Eu(2)-O(5e)    | 145.71(17) |
| O(6)-Eu(1)-O(11b)   | 75.12(15)  | O(3c)-Eu(2)-O(5e)   | 71.07(17)  |
| O(2W)-Eu(1)-O(11b)  | 137.95(16) | O(3c)-Eu(2)-O(7)    | 114.29(19) |
| O(9d)-Eu(2)-O(5e)   | 129.34(17) | O(9d)-Eu(2)-O(7)    | 151.12(15) |
| O(12)-Eu(2)-O(5e)   | 82.97(15)  | O(12)-Eu(2)-O(7)    | 127.23(14) |
| O(8c)-Eu(2)-O(7)    | 69.83(16)  | O(5e)-Eu(2)-O(7)    | 77.26(16)  |
| O(2)-Eu(2)-O(7)     | 83.24(17)  | O(8c)-Eu(2)-N(2)    | 128.38(17) |
| O(3c)-Eu(2)-N(2)    | 141.09(17) | O(2)-Eu(2)-N(2)     | 75.31(17)  |
| O(9d)-Eu(2)-N(2)    | 129.62(17) | O(5e)-Eu(2)-N(2)    | 70.86(16)  |
| O(12)-Eu(2)-N(2)    | 63.28(15)  | O(7)-Eu(2)-N(2)     | 64.06(15)  |

Compound 4

|                     |            |                     |            |
|---------------------|------------|---------------------|------------|
| Gd(1)-O(10a)        | 2.373(5)   | Gd(2)-O(2)          | 2.327(5)   |
| Gd(1)-O(1)          | 2.411(5)   | Gd(2)-O(8c)         | 2.333(5)   |
| Gd(1)-O(6)          | 2.423(5)   | Gd(2)-O(3c)         | 2.338(6)   |
| Gd(1)-O(2W)         | 2.425(5)   | Gd(2)-O(9d)         | 2.380(5)   |
| Gd(1)-O(1W)         | 2.431(5)   | Gd(2)-O(5e)         | 2.406(5)   |
| Gd(1)-O(3W)         | 2.472(6)   | Gd(2)-O(12)         | 2.407(5)   |
| Gd(1)-N(1)          | 2.518(6)   | Gd(2)-O(7)          | 2.409(5)   |
| Gd(1)-O(11b)        | 2.543(5)   | Gd(2)-N(2)          | 2.516(5)   |
| Gd(1)-O(12b)        | 2.554(4)   |                     |            |
| O(10a)-Gd(1)-O(1)   | 86.28(18)  | O(3W)-Gd(1)-O(11b)  | 142.97(18) |
| O(10a)-Gd(1)-O(6)   | 145.38(17) | N(1)-Gd(1)-O(11b)   | 66.61(17)  |
| O(1)-Gd(1)-O(6)     | 127.24(17) | O(10a)-Gd(1)-O(12b) | 75.90(16)  |
| O(10a)-Gd(1)-O(2W)  | 81.40(19)  | O(1)-Gd(1)-O(12b)   | 75.05(17)  |
| O(1)-Gd(1)-O(2W)    | 72.78(19)  | O(6)-Gd(1)-O(12b)   | 117.20(16) |
| O(6)-Gd(1)-O(2W)    | 99.11(19)  | O(2W)-Gd(1)-O(12b)  | 141.48(18) |
| O(10a)-Gd(1)-O(1W)  | 78.47(18)  | O(1W)-Gd(1)-O(12b)  | 71.04(17)  |
| O(1)-Gd(1)-O(1W)    | 145.26(18) | O(3W)-Gd(1)-O(12b)  | 134.23(18) |
| O(6)-Gd(1)-O(1W)    | 76.61(17)  | N(1)-Gd(1)-O(12b)   | 110.20(16) |
| O(2W)-Gd(1)-O(1W)   | 133.87(19) | O(11b)-Gd(1)-O(12b) | 50.90(15)  |
| O(10a)-Gd(1)-O(3W)  | 75.51(19)  | O(2)-Gd(2)-O(8c)    | 77.8(2)    |
| O(1)-Gd(1)-O(3W)    | 136.94(19) | O(2)-Gd(2)-O(3c)    | 143.2(2)   |
| O(6)-Gd(1)-O(3W)    | 73.26(18)  | O(8c)-Gd(2)-O(3c)   | 78.4(2)    |
| O(2W)-Gd(1)-O(3W)   | 66.2(2)    | O(2)-Gd(2)-O(9d)    | 77.85(19)  |
| O(1W)-Gd(1)-O(3W)   | 68.74(19)  | O(8c)-Gd(2)-O(9d)   | 84.54(18)  |
| O(10a)-Gd(1)-N(1)   | 145.70(19) | O(3c)-Gd(2)-O(9d)   | 72.3(2)    |
| O(1)-Gd(1)-N(1)     | 64.25(17)  | O(2)-Gd(2)-O(5e)    | 146.02(18) |
| O(6)-Gd(1)-N(1)     | 63.52(17)  | O(8c)-Gd(2)-O(5e)   | 120.5(2)   |
| O(2W)-Gd(1)-N(1)    | 73.64(19)  | O(3c)-Gd(2)-O(5e)   | 70.79(19)  |
| O(1W)-Gd(1)-N(1)    | 135.81(18) | O(9d)-Gd(2)-O(5e)   | 128.70(19) |
| O(3W)-Gd(1)-N(1)    | 113.63(19) | O(2)-Gd(2)-O(12)    | 86.75(18)  |
| O(10a)-Gd(1)-O(11b) | 126.73(16) | O(8c)-Gd(2)-O(12)   | 155.17(19) |



|                    |            |                   |            |
|--------------------|------------|-------------------|------------|
| O(1)-Gd(1)-O(11b)  | 78.48(17)  | O(3c)-Gd(2)-O(12) | 104.3(2)   |
| O(6)-Gd(1)-O(11b)  | 74.91(17)  | O(9d)-Gd(2)-O(12) | 73.19(17)  |
| O(2W)-Gd(1)-O(11b) | 138.12(18) | O(5e)-Gd(2)-O(12) | 82.84(17)  |
| O(1W)-Gd(1)-O(11b) | 85.93(17)  | O(2)-Gd(2)-O(7)   | 83.79(18)  |
| O(2)-Gd(2)-N(2)    | 75.63(18)  | O(8c)-Gd(2)-O(7)  | 70.27(17)  |
| O(8c)-Gd(2)-N(2)   | 128.82(19) | O(3c)-Gd(2)-O(7)  | 113.7(2)   |
| O(3c)-Gd(2)-N(2)   | 140.82(19) | O(9d)-Gd(2)-O(7)  | 151.49(18) |
| O(9d)-Gd(2)-N(2)   | 129.97(19) | O(5e)-Gd(2)-O(7)  | 77.40(18)  |
| O(5e)-Gd(2)-N(2)   | 70.74(17)  | O(12)-Gd(2)-O(7)  | 127.65(15) |
| O(12)-Gd(2)-N(2)   | 63.71(17)  | O(7)-Gd(2)-N(2)   | 64.05(17)  |

**Compound 5**

|                     |            |                   |            |
|---------------------|------------|-------------------|------------|
| Tb(1)-O(10a)        | 2.308(5)   | Tb(2)-O(2)        | 2.292(5)   |
| Tb(1)-O(2W)         | 2.331(5)   | Tb(2)-O(8c)       | 2.304(5)   |
| Tb(1)-O(1W)         | 2.337(5)   | Tb(2)-O(3c)       | 2.323(5)   |
| Tb(1)-O(1)          | 2.354(5)   | Tb(2)-O(5d)       | 2.355(5)   |
| Tb(1)-O(6)          | 2.398(5)   | Tb(2)-O(9e)       | 2.357(4)   |
| Tb(1)-O(12b)        | 2.454(4)   | Tb(2)-O(12)       | 2.403(4)   |
| Tb(1)-N(1)          | 2.475(5)   | Tb(2)-O(7)        | 2.443(4)   |
| Tb(1)-O(11b)        | 2.503(5)   | Tb(2)-N(2)        | 2.512(5)   |
| O(10a)-Tb(1)-O(2W)  | 80.02(17)  | N(1)-Tb(1)-O(11b) | 71.66(16)  |
| O(10a)-Tb(1)-O(1W)  | 76.43(17)  | O(2)-Tb(2)-O(8c)  | 79.54(18)  |
| O(2W)-Tb(1)-O(1W)   | 100.72(18) | O(2)-Tb(2)-O(3c)  | 144.69(18) |
| O(10a)-Tb(1)-O(1)   | 83.43(17)  | O(8c)-Tb(2)-O(3c) | 81.77(17)  |
| O(2W)-Tb(1)-O(1)    | 87.83(17)  | O(2)-Tb(2)-O(5d)  | 142.96(17) |
| O(1W)-Tb(1)-O(1)    | 156.27(16) | O(8c)-Tb(2)-O(5d) | 116.02(17) |
| O(10a)-Tb(1)-O(6)   | 143.36(16) | O(3c)-Tb(2)-O(5d) | 72.35(17)  |
| O(2W)-Tb(1)-O(6)    | 85.17(16)  | O(2)-Tb(2)-O(9e)  | 76.21(17)  |
| O(1W)-Tb(1)-O(6)    | 73.69(15)  | O(8c)-Tb(2)-O(9e) | 84.36(16)  |
| O(1)-Tb(1)-O(6)     | 129.49(15) | O(3c)-Tb(2)-O(9e) | 72.35(17)  |
| O(10a)-Tb(1)-O(12b) | 75.79(15)  | O(5d)-Tb(2)-O(9e) | 135.57(16) |
| O(2W)-Tb(1)-O(12b)  | 154.67(16) | O(2)-Tb(2)-O(12)  | 94.18(16)  |
| O(1W)-Tb(1)-O(12b)  | 80.89(16)  | O(8c)-Tb(2)-O(12) | 158.89(16) |

|                     |            |                   |            |
|---------------------|------------|-------------------|------------|
| O(1)-Tb(1)-O(12b)   | 82.11(15)  | O(3c)-Tb(2)-O(12) | 92.61(16)  |
| O(6)-Tb(1)-O(12b)   | 119.04(15) | O(5d)-Tb(2)-O(12) | 81.01(15)  |
| O(10a)-Tb(1)-N(1)   | 141.07(17) | O(9e)-Tb(2)-O(12) | 74.56(15)  |
| O(2W)-Tb(1)-N(1)    | 76.42(17)  | O(2)-Tb(2)-O(7)   | 77.11(16)  |
| O(1W)-Tb(1)-N(1)    | 138.15(17) | O(8c)-Tb(2)-O(7)  | 71.63(16)  |
| O(1)-Tb(1)-N(1)     | 65.26(17)  | O(3c)-Tb(2)-O(7)  | 124.26(16) |
| O(6)-Tb(1)-N(1)     | 64.46(16)  | O(5d)-Tb(2)-O(7)  | 76.88(16)  |
| O(12b)-Tb(1)-N(1)   | 119.17(16) | O(9e)-Tb(2)-O(7)  | 146.79(15) |
| O(10a)-Tb(1)-O(11b) | 127.61(15) | O(12)-Tb(2)-O(7)  | 126.94(15) |
| O(2W)-Tb(1)-O(11b)  | 148.01(15) | O(2)-Tb(2)-N(2)   | 73.48(17)  |
| O(1W)-Tb(1)-O(11b)  | 101.54(17) | O(8c)-Tb(2)-N(2)  | 131.52(17) |
| O(1)-Tb(1)-O(11b)   | 80.87(16)  | O(3c)-Tb(2)-N(2)  | 139.26(17) |
| O(6)-Tb(1)-O(11b)   | 79.39(15)  | O(5d)-Tb(2)-N(2)  | 71.50(17)  |
| O(12b)-Tb(1)-O(11b) | 52.73(14)  | O(9e)-Tb(2)-N(2)  | 125.40(16) |
| O(7)-Tb(2)-N(2)     | 63.60(15)  | O(12)-Tb(2)-N(2)  | 63.76(16)  |

**Compound 6**

|                    |            |                     |            |
|--------------------|------------|---------------------|------------|
| Dy(1)-O(10a)       | 2.298(4)   | Dy(2)-O(2)          | 2.292(4)   |
| Dy(1)-O(1W)        | 2.323(4)   | Dy(2)-O(8c)         | 2.296(4)   |
| Dy(1)-O(2W)        | 2.329(5)   | Dy(2)-O(3c)         | 2.297(5)   |
| Dy(1)-O(1)         | 2.336(4)   | Dy(2)-O(9d)         | 2.345(4)   |
| Dy(1)-O(6)         | 2.376(4)   | Dy(2)-O(5e)         | 2.362(4)   |
| Dy(1)-N(1)         | 2.453(5)   | Dy(2)-O(12)         | 2.390(4)   |
| Dy(1)-O(12b)       | 2.455(4)   | Dy(2)-O(7)          | 2.422(4)   |
| Dy(1)-O(11b)       | 2.488(4)   | Dy(2)-N(2)          | 2.503(5)   |
| O(10a)-Dy(1)-O(1W) | 76.12(17)  | O(12b)-Dy(1)-O(11b) | 52.79(13)  |
| O(10a)-Dy(1)-O(2W) | 79.24(17)  | O(2)-Dy(2)-O(8c)    | 79.50(18)  |
| O(1W)-Dy(1)-O(2W)  | 101.58(18) | O(2)-Dy(2)-O(3c)    | 144.69(18) |
| O(10a)-Dy(1)-O(1)  | 82.78(16)  | O(8c)-Dy(2)-O(3c)   | 80.91(18)  |
| O(1W)-Dy(1)-O(1)   | 154.87(15) | O(2)-Dy(2)-O(9d)    | 76.61(16)  |
| O(2W)-Dy(1)-O(1)   | 87.53(17)  | O(8c)-Dy(2)-O(9d)   | 83.71(16)  |
| O(10a)-Dy(1)-O(6)  | 142.66(15) | O(3c)-Dy(2)-O(9d)   | 72.27(18)  |
| O(1W)-Dy(1)-O(6)   | 74.33(15)  | O(2)-Dy(2)-O(5e)    | 143.78(17) |

|                     |            |                   |            |
|---------------------|------------|-------------------|------------|
| O(2W)-Dy(1)-O(6)    | 84.82(16)  | O(8c)-Dy(2)-O(5e) | 117.43(17) |
| O(1)-Dy(1)-O(6)     | 130.26(15) | O(3c)-Dy(2)-O(5e) | 71.53(18)  |
| O(10a)-Dy(1)-N(1)   | 140.73(17) | O(9d)-Dy(2)-O(5e) | 133.74(16) |
| O(1W)-Dy(1)-N(1)    | 138.89(15) | O(2)-Dy(2)-O(12)  | 91.53(16)  |
| O(2W)-Dy(1)-N(1)    | 76.50(17)  | O(8c)-Dy(2)-O(12) | 157.39(15) |
| O(1)-Dy(1)-N(1)     | 65.85(15)  | O(3c)-Dy(2)-O(12) | 95.51(16)  |
| O(6)-Dy(1)-N(1)     | 64.57(15)  | O(9d)-Dy(2)-O(12) | 73.99(14)  |
| O(10a)-Dy(1)-O(12b) | 76.85(14)  | O(5e)-Dy(2)-O(12) | 81.83(14)  |
| O(1W)-Dy(1)-O(12b)  | 80.41(16)  | O(2)-Dy(2)-O(7)   | 79.10(15)  |
| O(2W)-Dy(1)-O(12b)  | 154.77(15) | O(8c)-Dy(2)-O(7)  | 71.36(15)  |
| O(1)-Dy(1)-O(12b)   | 81.63(15)  | O(3c)-Dy(2)-O(7)  | 121.36(17) |
| O(6)-Dy(1)-O(12b)   | 119.43(14) | O(9d)-Dy(2)-O(7)  | 147.86(15) |
| N(1)-Dy(1)-O(12b)   | 118.55(15) | O(5e)-Dy(2)-O(7)  | 77.20(15)  |
| O(10a)-Dy(1)-O(11b) | 128.88(14) | O(12)-Dy(2)-O(7)  | 127.61(13) |
| O(1W)-Dy(1)-O(11b)  | 100.77(17) | O(2)-Dy(2)-N(2)   | 73.99(16)  |
| O(2W)-Dy(1)-O(11b)  | 147.76(16) | O(8c)-Dy(2)-N(2)  | 131.13(16) |
| O(1)-Dy(1)-O(11b)   | 81.91(16)  | O(3c)-Dy(2)-N(2)  | 139.42(17) |
| O(6)-Dy(1)-O(11b)   | 79.19(14)  | O(9d)-Dy(2)-N(2)  | 127.11(16) |
| N(1)-Dy(1)-O(11b)   | 71.37(15)  | O(5e)-Dy(2)-N(2)  | 71.10(16)  |
| O(12)-Dy(2)-N(2)    | 64.01(14)  | O(7)-Dy(2)-N(2)   | 63.85(15)  |

**Compound 7**

|                    |            |                     |            |
|--------------------|------------|---------------------|------------|
| Ho(1)-O(10a)       | 2.296(3)   | Ho(2)-O(2)          | 2.279(3)   |
| Ho(1)-O(1W)        | 2.304(3)   | Ho(2)-O(8c)         | 2.293(3)   |
| Ho(1)-O(2W)        | 2.316(3)   | Ho(2)-O(3c)         | 2.294(3)   |
| Ho(1)-O(1)         | 2.325(3)   | Ho(2)-O(9d)         | 2.343(3)   |
| Ho(1)-O(6)         | 2.378(3)   | Ho(2)-O(5e)         | 2.356(3)   |
| Ho(1)-N(1)         | 2.448(4)   | Ho(2)-O(12)         | 2.381(3)   |
| Ho(1)-O(12b)       | 2.450(3)   | Ho(2)-O(7)          | 2.417(3)   |
| Ho(1)-O(11b)       | 2.476(3)   | Ho(2)-N(2)          | 2.498(4)   |
| O(10a)-Ho(1)-O(1W) | 76.46(13)  | O(12b)-Ho(1)-O(11b) | 52.94(10)  |
| O(10a)-Ho(1)-O(2W) | 79.21(13)  | O(2)-Ho(2)-O(8c)    | 79.84(14)  |
| O(1W)-Ho(1)-O(2W)  | 100.36(13) | O(2)-Ho(2)-O(3c)    | 144.94(14) |

|                     |            |                   |            |
|---------------------|------------|-------------------|------------|
| O(10a)-Ho(1)-O(1)   | 82.47(12)  | O(8c)-Ho(2)-O(3c) | 80.80(14)  |
| O(1W)-Ho(1)-O(1)    | 155.05(12) | O(2)-Ho(2)-O(9d)  | 76.52(12)  |
| O(2W)-Ho(1)-O(1)    | 88.51(13)  | O(8c)-Ho(2)-O(9d) | 83.83(12)  |
| O(10a)-Ho(1)-O(6)   | 142.79(12) | O(3c)-Ho(2)-O(9d) | 72.56(14)  |
| O(1W)-Ho(1)-O(6)    | 73.80(11)  | O(2)-Ho(2)-O(5e)  | 143.59(13) |
| O(2W)-Ho(1)-O(6)    | 84.62(12)  | O(8c)-Ho(2)-O(5e) | 116.44(13) |
| O(1)-Ho(1)-O(6)     | 130.63(11) | O(3c)-Ho(2)-O(5e) | 71.46(14)  |
| O(10a)-Ho(1)-N(1)   | 140.40(13) | O(9d)-Ho(2)-O(5e) | 134.47(12) |
| O(1W)-Ho(1)-N(1)    | 138.67(12) | O(2)-Ho(2)-O(12)  | 92.30(12)  |
| O(2W)-Ho(1)-N(1)    | 76.80(13)  | O(8c)-Ho(2)-O(12) | 157.72(12) |
| O(1)-Ho(1)-N(1)     | 65.95(11)  | O(3c)-Ho(2)-O(12) | 94.72(12)  |
| O(6)-Ho(1)-N(1)     | 64.87(11)  | O(9d)-Ho(2)-O(12) | 74.04(11)  |
| O(10a)-Ho(1)-O(12b) | 76.53(11)  | O(5e)-Ho(2)-O(12) | 82.05(11)  |
| O(1W)-Ho(1)-O(12b)  | 80.64(12)  | O(2)-Ho(2)-O(7)   | 78.65(12)  |
| O(2W)-Ho(1)-O(12b)  | 154.77(12) | O(8c)-Ho(2)-O(7)  | 71.24(11)  |
| O(1)-Ho(1)-O(12b)   | 81.59(11)  | O(3c)-Ho(2)-O(7)  | 121.62(13) |
| O(6)-Ho(1)-O(12b)   | 119.30(11) | O(9d)-Ho(2)-O(7)  | 147.42(11) |
| N(1)-Ho(1)-O(12b)   | 119.02(11) | O(5e)-Ho(2)-O(7)  | 76.90(12)  |
| O(10a)-Ho(1)-O(11b) | 128.67(11) | O(12)-Ho(2)-O(7)  | 127.94(10) |
| O(1W)-Ho(1)-O(11b)  | 100.87(12) | O(2)-Ho(2)-N(2)   | 73.73(12)  |
| O(2W)-Ho(1)-O(11b)  | 148.37(12) | O(8c)-Ho(2)-N(2)  | 131.32(12) |
| O(1)-Ho(1)-O(11b)   | 81.96(12)  | O(3c)-Ho(2)-N(2)  | 139.38(13) |
| O(6)-Ho(1)-O(11b)   | 79.13(11)  | O(9d)-Ho(2)-N(2)  | 126.74(12) |
| N(1)-Ho(1)-O(11b)   | 71.75(11)  | O(5e)-Ho(2)-N(2)  | 71.44(12)  |
| O(7)-Ho(2)-N(2)     | 64.00(11)  | O(12)-Ho(2)-N(2)  | 64.25(11)  |

Symmetry codes: *a*)  $x, y-1, z$ ; *b*)  $x+1, -y+1, z-1/2$ ; *c*)  $x+1, -y+2, z-1/2$ ; *d*)  $x, -y+2, z-1/2$ ; *e*)  $x, -y+2, z+1/2$  for **1**; *a*)  $-x, y-1, -z+1/2$ ; *b*)  $-x, y, -z+1/2$ ; *c*)  $-x+1/2, y-1/2, -z+1/2$ ; *d*)  $x, y-1, z$ ; *e*)  $x, -y+1, z-1/2$  for **2**; *a*)  $-x, y-1, -z+1/2$ ; *b*)  $-x, y, -z+1/2$ ; *c*)  $-x+1/2, y-1/2, -z+1/2$ ; *d*)  $x, y-1, z$ ; *e*)  $x, -y+1, z-1/2$ ; for **3**; *a*)  $-x, y-1, -z+1/2$ ; *b*)  $-x, y, -z+1/2$ ; *c*)  $-x+1/2, y-1/2, -z+1/2$ ; *d*)  $x, y-1, z$ ; *e*)  $x, -y+1, z-1/2$ ; for **4**; *a*)  $-x, y-1, -z+1/2$ ; *b*)  $-x, y, -z+1/2$ ; *c*)  $-x+1/2, y-1/2, -z+1/2$ ; *d*)  $x, -y+1, z-1/2$ ; *e*)  $x, y-1, z$  for **5**; *a*)  $-x, y-1, -z+1/2$ ; *b*)  $-x, y, -z+1/2$ ; *c*)  $-x+1/2, y-1/2, -z+1/2$ ; *d*)  $x, -y+1, z-1/2$ ; *e*)  $x, y-1, z$  for **6**; *a*)  $-x, y-1, -z+1/2$ ; *b*)  $-x, y, -z+1/2$ ; *c*)  $-x+1/2, y-1/2, -z+1/2$ ; *d*)  $x, y-1, z$ ; *e*)  $x, -y+1, z-1/2$  for **7**.

**Table S2:** Coordination number (CN) and average bond lengths (Å) for **1-7**.

| compound | CN   | Ln-O <sub>carboxylate</sub> | Ln-O <sub>water</sub> | Ln-N  |
|----------|------|-----------------------------|-----------------------|-------|
| <b>1</b> | 9, 9 | 2.478                       | 2.530                 | 2.603 |
| <b>2</b> | 8, 9 | 2.433                       | 2.476                 | 2.541 |
| <b>3</b> | 8, 9 | 2.420                       | 2.454                 | 2.526 |
| <b>4</b> | 8, 9 | 2.409                       | 2.448                 | 2.518 |
| <b>5</b> | 8, 8 | 2.375                       | 2.333                 | 2.493 |
| <b>6</b> | 8, 8 | 2.363                       | 2.326                 | 2.478 |
| <b>7</b> | 8, 8 | 2.357                       | 2.310                 | 2.473 |
